# 1 Migration of gastric cancer is suppressed by rabies virus

## 2 glycoprotein via regulating $\alpha 7$ -nicotinic acetylcholine

### 3 receptors/ERK- EMT

4 Xufeng Bu <sup>1</sup>, Anwei Zhang<sup>1,2#</sup>, Zhengwei Chen<sup>2</sup>, Xunfeng Zhang<sup>2</sup>, Chao yun Yin<sup>2</sup>,Jie  
5 Zhang<sup>1</sup>,Yao Zhang<sup>2</sup>, Riting Zhang<sup>2</sup>,Xiaomei Shao<sup>2</sup>,Yulan Yan <sup>3\*</sup>

6 1 Department of General Surgery, Affiliated People's Hospital of Jiangsu University Zhenjiang  
7 China.

8 2 Clinical Medicine College of Jiangsu University, Zhenjiang, China.

9 3\* Corresponding Author: Department of Respiratory Medicine, Affiliated People's Hospital of  
10 Jiangsu University, DianLi Road No.8, Zhenjiang, JiangSu 212002. China.

11 Tel: +86-0511-88915373.E-mail :ylyan2005@163.com

12 # equal contribution

13  
14 **Abstract** Nicotinic acetylcholine receptors (nAChRs) have been reported to be overexpressed in  
15 malignancies in humans and is associated with tumorigenesis and cell migration. In previous  
16 studies of gastric cancer, alpha7 nicotinic acetylcholine receptor ( $\alpha 7$ -nAChR) overexpression can  
17 induce epithelial-mesenchymal transition (EMT) and promote migration of gastric cancer cells.  
18 Recombinant avirulent Newcastle disease virus (NDV) LaSota strain expressing the rabies virus  
19 glycoprotein (rL-RVG) may promote apoptosis of gastric cancer cells and reduces migration of  
20 lung cancer metastasis. However, whether rL-RVG inhibits migration of gastric cancer cells and  
21 what the underlying functional mechanism is remains unknown. In this study, our findings  
22 demonstrate that rL-RVG suppressed migration and reduced EMT of gastric cancer cells via  
23  $\alpha 7$ -nAChR in vitro. Furthermore rL-RVG decreased the phosphorylation levels of the MEK/ERK  
24 signaling pathway such as down-regulating the expression of P-MEK and P-ERK. Additionally,

25 rL-RVG also reduced the expression level of mesenchymal markers N-cadherin and Vimentin and  
 26 enhanced the expression of the epithelial marker E-cadherin. Lastly, rL-RVG together with  
 27 nicotinic acetylcholine receptors (nAChRs) inhibited gastric cancer epithelial to mesenchymal  
 28 transition (EMT) which suppressed gastric cancer cell migration. We also found that rL-RVG  
 29 suppresses the growth of gastric cancer subcutaneous tumor cells *in vivo*. Thus, rL-RVG inhibits  
 30  $\alpha 7$ -nAChR-MEK/ERK-EMT to suppress migration of gastric cancer cells.

31 **Key words:** recombinant newcastle disease virus, rabies virus  
 32 glycoprotein,  $\alpha 7$ -nAChR, epithelial-mesenchymal transition, cell migration, gastric cancer, ERK

### 33 **Introduction**

34 Stomach cancer is the fifth most common malignancy and the third major cause in  
 35 cancer-related deaths in the world<sup>[1]</sup>. Moreover, the death rate of stomach cancer is the  
 36 second highest among all cancer related deaths in China<sup>[2]</sup>. It is difficult to detect the  
 37 early stages of gastric cancer and there are an overwhelming number of patients who  
 38 are diagnosed at the advanced stages of disease<sup>[3]</sup>. Therefore, the study of the  
 39 mechanisms of cancer cell migration mechanism during stomach cancer is of great  
 40 significance for new drug discoveries and for the development of effective treatments  
 41 for gastric cancer. Currently, the main treatment of gastric cancer consists only of  
 42 surgical treatment, radiotherapy and chemotherapy. However, these methods are  
 43 accompanied by poor patient prognosis with advanced gastric cancer and therefore a  
 44 novel treatment is urgently needed for people affected by this devastating disease.

45 Nicotinic acetylcholine receptors (nAChRs) are a type of ligand-gated ion channel  
 46 proteins, and their expression is not only found in neuronal cells but also in

47 non-neuronal cells including gastric cancer cells <sup>[4,5]</sup>. Alpha7 nicotinic acetylcholine  
 48 receptor ( $\alpha 7$ -nAChR) is a member of the family of nAChRs and is widely distributed  
 49 in epithelial cells of the stomach <sup>[6,7]</sup>. It has been reported that the activation of  
 50  $\alpha 7$ -nAChR plays an important role in the proliferation and migration of cancer cells.  
 51 Extracellular signal-regulated kinase (ERK) signaling pathway is involved in a variety  
 52 of functions and activated by several stimuli including  $\alpha 7$ -nAChR<sup>[8]</sup>.

53 Epithelial to mesenchymal transition (EMT) is the original biological step required for  
 54 the invasion of cancer cells and metastasis. A hallmark of EMT includes the presence  
 55 of mesenchymal markers such as N-cadherin, Vimentin and epithelial marker  
 56 E-cadherin<sup>[9,10]</sup>. EMT is of great significance in tumor migration <sup>[11]</sup>, and a recent  
 57 study also suggested that alpha 7-nAChR overexpression could enhance EMT to  
 58 promote proliferation and migration of gastric cancer cells<sup>[12]</sup>. Moreover, it was  
 59 reported that nicotine could promote EMT to induce migration of cancer cells via  
 60 regulation of the alpha 7-nAChR/MEK/ERK pathway <sup>[13]</sup>.

61 Alpha 7-nAChR may be a potential therapeutic key point for the treatment of stomach  
 62 cancer. Previous studies have also demonstrated that recombinant avirulent NDV  
 63 LaSota strain, expressing the rabies virus glycoprotein (rL-RVG), could induce the  
 64 apoptosis of gastric cancer cells as well as suppress the migration of lung cancer cells  
 65 by regulating  $\alpha 7$ -nAChR <sup>[14,15]</sup>. However, it still remains unclear whether rL-RVG  
 66 could also suppress the migration of gastric cancer and its underlying mechanism. In  
 67 this study, we would explore if rL-RVG could suppress migration of gastric cancer  
 68 via regulating  $\alpha 7$ -nAChR/ERK signaling and EMT.

## 69 **Materials and methods**

### 70 **Materials**

71 The rL-RVG, NDV, anti-RVG antibody and anti-NDV antibody were stored at -80°C  
 72 supplied by the Harbin Veterinary Research Institute (Harbin, China).The gastric  
 73 cancer cell lines SGC7901 and BGC were purchased from biological sciences cell  
 74 resource center of the Chinese academy of sciences, Shanghai Institute. Nude mice  
 75 were purchased from the Animal Experiment Center of Yangzhou University  
 76 (Yangzhou, China). Methyllaconitine citrate hydrate (MLA) (5mg/mL) which  
 77 worked as a specific competitive  $\alpha 7$ -nAChR antagonist was purchased from Santa  
 78 Cruz (California, USA). Acetylcholine bromide (ACB) (5mg/mL),an acetylcholine  
 79 agonist, was obtained from Sigma-Aldrich (St. Louis, MO, USA).In addition, small  
 80 interfering RNA (si-RNA) for  $\alpha 7$ -nAChR was purchased from RiboBio (GuangZhou,  
 81 China).Corynoxenine (10mM 1mL in DMSO),the inhibitor of the MEK-ERK pathway,  
 82 was purchased from MedChemExpress (MCE,USA). Rabbit polyclonal anti- $\alpha 7$   
 83 nAChR was purchased from Abcam (London, UK); rabbit polyclonal anti-MEK1/2,  
 84 anti-P-MEK1/2, anti-ERK1/2, anti-P-ERK1/2 and anti-snail were purchased from Cell  
 85 Signaling Technology (CST, USA); Mouse monoclonal anti-N-Cadherin, E-Cadherin  
 86 and Vimentin were purchased from Boster (WuHan,China).

### 87 **Cell Culture Reagents, Viruses and Treatment**

88 The cell lines BGC and SGC7901 were cultured in RPMI 1640 supplemented with 10%  
 89 fetal bovine serum, penicillin (100U/mL), and streptomycin (100 $\mu$ g/mL) in a

90 humidified incubator (37°C, 5% CO<sub>2</sub>). In addition, when BGC and SGC cell lines  
 91 reached their logarithmic proliferation stage of up to 80% confluency, they were then  
 92 sub cultured or used for experiments. The cultured cell lines were randomly divided  
 93 into rL-RVG, NDV and PBS groups, along with the MLA, ACB, si-RNA of  
 94 α7-nAChR and corynoxenine pretreatment groups.

### 95 **CCK-8 Assay**

96 The viability of infected BGC and SGC were monitored by performing a CCK-8  
 97 assay. BGC and SGC were harvested, pelleted by centrifugation and counted using a  
 98 blood counting chamber. Cells (6×10<sup>3</sup>) were then seeded into 96-well plates and  
 99 grown in media containing varying dilution titers of rL-RVG or NDV 24 h. The  
 100 CCK-8 reagent was added into each well incubated for another 4 h. Lastly, the color  
 101 of the media changed in each well and was measured at 450 nm using a  
 102 spectrophotometer.

### 103 **Clonogenic survival assay**

104 BGC and SGC were seeded into 6-well plates (1000 cells per well) and then infected  
 105 with rL-RVG, NDV at a multiplicity of infection of 10 or with PBS for 24 h. After  
 106 incubation in media for 10 days, the cells were fixed by absolute ethyl alcohol for 30  
 107 minutes and stained for 1 hour with crystal violet (0.2%) to visualize cell colonies.  
 108 Each individual experiment was repeated three times.

### 109 **Wound-Healing Assay**

110 BGC and SGC were added into 6-well plates and randomly divided into rL-RVG,

111 NDV and PBS treated groups in which cell were infected by rL-RVG,NDV or PBS  
112 for 24 h. Groups pretreated with ACB, MLA, si-RNA or corynoxine for 24 h were  
113 also set up. When cells reached 80% confluency, cell monolayers were wounded with  
114 a 10  $\mu$ L pipette tip after 24 h and their wound healing ability was observed by  
115 microscopy.

## 116 **Migration Assay**

117 To carry out migration assay 24-well plate transwell units with polycarbonate  
118 membrane (8.0 $\mu$ m pore size;Costar,MA,USA) were used for in-vitro experiments  
119 according to the manufacturer's protocol. In short, the upper chamber of filter inserts  
120 contained serum free medium with  $1 \times 10^5$  cells belonging to one of the treatment  
121 groups: rL-RVG, NDV, PBS, MLA, ACB, si-RNA of  $\alpha 7$ -nAChR or corynoxine.  
122 Meanwhile, the lower chamber was filled with 600  $\mu$ L 10% serum media. After  
123 incubation at 37°C in 5%CO<sub>2</sub> for 24 h, the media in the lower chamber were collected  
124 and then non migrating cells attached to the membrane of the upper chamber surface  
125 were scrubbed. Finally, cells on the bottom wells were stained with 0.1% crystal  
126 violet for 20 minutes ,and then washed with PBS for 3 times. Lastly, the migrating  
127 cells were counted under the microscope and analyzed by using Image-J software.  
128 (National Institutes of Health,USA).

## 129 **Western Blot Analysis**

130 After pre-treatment with MLA or ACB or si-RNA of  $\alpha 7$ -nAChR or corynoxine for  
131 12 h , cells were infected for 24 h with either rL-RVG,NDV or PBS and then washed

132 with ice-cold PBS for 3 times and lysed by using the lysis buffer RIPA containing 1  
133 mM PMSF for 30 minutes on ice. Next the lysates were collected and the protein  
134 concentrations were quantified using a BCA kit (Thermo Fisher Scientific,  
135 USA). Equal quantities of protein were separated by using a 10% SDS-PAGE and the  
136 proteins were then transferred to polyvinylidenedifluoride (PVDF) membranes  
137 (Bio-Rad Laboratories). The membranes were then blocked with 5% BSA in  
138 Tris-buffered saline containing 0.1% Tween 20 (TBST, at pH 7.5) for about 2 hours at  
139 room temperature before washing them with TBST for 15 minutes for 3 times. Next  
140 the membranes were incubated with antibodies at 4°C overnight with the following  
141 antibodies: anti- $\alpha 7$  nAChR, anti-P-MEK, anti-MEK, anti-P-ERK, anti-ERK,  
142 anti-E-cadherin, anti-N-cadherin and anti-Vimentin. Proteins were detected with  
143 HRP-conjugated secondary antibodies for 1 h at room temperature. The protein bands  
144 were visualized with a Typhoon 9400 variable mode imager (Amersham Biosciences,  
145 UK) using chemiluminescence (ECL Plus Substrate, Thermo Fisher Scientific, USA).

#### 146 **Immunofluorescent Assay**

147 BGC and SGC cells were added into 24-well plates and fixed with 4%  
148 paraformaldehyde for 2 h at room temperature. Cells were then permeabilized with  
149 0.5 % TritonX-100 in PBS for 10 minutes and blocked with 5% BSA for 1 h. Next the  
150 cells were washed 3 times with PBS for 5 min before incubating them with  
151 anti-P-ERK at 4°C overnight. On the next day, the secondary antibody was used to  
152 stain cells in order to be detected for immunofluorescence microscopy.

#### 153 **Xenografts**

154 After infection of BGC, SGC cells with rL-RVG, NDV and PBS for 24 h, the cells

155 were subcutaneously injected into axillary subcutaneous tissues of adult female  
156 athymic-nude mice which were randomly selected for the treatment with either  
157 rL-RVG,NDV or PBS and housed under specific pathogen free conditions. The size of  
158 subcutaneous tumors that developed were measured 2 weeks post treatment using the  
159 following calculation:  $V=W^2L0.5$  (V is volume, W is width and L is length).

## 160 **Statistical Analysis**

161 All collected experimental data is presented as mean  $\pm$  SD. A Student's t-test or one  
162 -way ANOVA with Bonferroni post-test was used to calculate statistical significance  
163 using the GraphPad Prism7.0 software (La Jolla,CA, USA). A p-value of  $P<0.05$  or  
164  $P<0.01$  was considered statistically significant. Each experiment was conducted  
165 independently and repeated at least 3 times.

## 166 **Results**

### 167 **RVG and NDV protein expression in gastric cancer cells**

168 To investigate the mechanism of rL-RVG suppressing the migration of gastric cancer  
169 cells, we first analyzed the expression of rL-RVG and NDV proteins in gastric cancer.  
170 Previous studies show that lung cancer cell exhibit a stable expression of RVG and  
171 NDV proteins by PCR, Western blot and immunofluorescence microscopy <sup>[16]</sup>.In our  
172 study, we used Western blot to analyze both RVG and NDV protein expression in  
173 virally infected gastric cancer cells and found that RVG proteins were only expressed  
174 in the rL-RVG group while the expression of NDV proteins was expressed in both the  
175 rL-RVG and NDV group (Fig.1A).



## 176 **rL-RVG suppressed the proliferation and migration of gastric cancer cells**

177 Metastasis is a big hurdle in the management of gastric cancer. To study metastasis  
178 migration we used a transwell based and wound healing assay to monitor the  
179 influence of viruses on gastric cancer cells migration. After infecting cells with  
180 rL-RVG or NDV for 24 h, we observed that rL-RVG and NDV both reduced the  
181 migration of gastric cancer cells compared to the PBS treated group. Of note is that  
182 the inhibitory migration was stronger in rL-RVG treated cells compared to the NDV  
183 group (Fig 2A,B).Moreover, we found that rL-RVG had an inhibitory influence on the  
184 migration of both SGC and BGC and SGC-7901 cells and were therefore selected for  
185 further analysis in subsequent experiments.

186 To detect the viability of gastric cancer cells SGC7901 and BGC cells were infecting  
187 with rL-RVG or NDV for 24 h and analysed using a CCK8 assay. rL-RVG and NDV  
188 both suppressed cell proliferation in a concentration-dependent manner but overall  
189 rL-RVG had a stronger inhibitory effect on proliferation compared to NDV and the  
190 PBS control group. If rL-RVG and NDV were diluted to  $10^3$  and  $10^2$  respectively, the  
191 viability of SGC and BGC cells was higher than 80%, and the viral titer was  
192 approximately  $10^{9.8}$  EID<sub>50</sub> /mL (Fig 2C,D).

## 193 **The role of $\alpha 7$ -nAChR in the process of rL-RVG regulated migratory abilities of** 194 **gastric cancer cells**

195 The expression of  $\alpha 7$ -nAChR in the rL-RVG and NDV groups was higher compared  
196 with PBS group using Western Blot analysis. However the cell migratory ability in

197 both the rL-RVG and NDV group was suppressed compared with the PBS control  
198 blank group. rL-RVG suppressed the migration more potently compared with the  
199 NDV and PBS groups (Fig 1A, Fig 2A,B). Further exploration regarding the role of  
200  $\alpha 7$ -nAChR in rL-RVG on the suppression of the migration of gastric cancer cells is  
201 necessary and the following treatments were performed.

202 MLA, an antagonist of  $\alpha 7$ -nAChR was used to pre-treat SGC7901 cells for 24 h  
203 before infecting them with virus. Our result shows that  $\alpha 7$ -nAChR expression was  
204 inhibited in a competitive manner and moreover, the migration of SGC7901 cells was  
205 more suppressed in the MLA pre-treatment groups compared to the not pre-treated  
206 groups as shown in our migration and wound healing assays. This result suggests that  
207 rL-RVG may suppress cell migration through the  $\alpha 7$ -nAChR pathway (Fig 4A,B).

208 To further verify the role of  $\alpha 7$ -nAChR in rL-RVG-induced cells migration, we used  
209 small interfering RNA methods to knock down the expression of  $\alpha 7$ -nAChR. We  
210 found that our results were consistent with the groups pre-treated with MLA.  
211 Therefore, rL-RVG may play a role as competitive antagonist of  $\alpha 7$ -nAChR to inhibit  
212 the migration of SGC7901 cells (Fig 5A,B).

213 In support of these results we found that ACB, an agonist of  $\alpha 7$ -nAChR stimulates the  
214 expression of  $\alpha 7$ -nAChR (Fig 3A,B). In contrast to this, we got the opposite result  
215 when comparing our result with MLA or si-RNA pre-treated cells. Thus, rL-RVG  
216 suppresses the migration of SGC7901 cells by inhibiting  $\alpha 7$ -nAChR competitively.

217 **MEK/ERK signaling pathway was involved in rL-RVG-lowing migration of**

## 218 **gastric cancer cell**

219 It was shown previously that  $\alpha 7$ -nAChR activates several signaling pathways in  
 220 connection with tumorigenic effects including the MEK/ERK pathway<sup>[8]</sup>. The role of  
 221 the extracellular signal-regulated kinase (ERK) signaling pathway in the  
 222 rL-RVG-induced suppression of cell the migration during gastric cancer remains  
 223 unclear. Western blot analysis showed that rL-RVG induces the down-regulation of  
 224 phosphorylation levels of ERK1/2 when  $\alpha 7$ -nAChR expression was blocked by  
 225 rL-RVG. Furthermore the migratory ability of gastric cancer cells was also reduced.  
 226 Consistent with these results we showed by immunofluorescence that the expression  
 227 level of P-ERK was down-regulated after being infected with either rL-RVG or NDV  
 228 but was lower in the rL-RVG group compared with the NDV and PBS blank control  
 229 group (Fig 1 A,B and Fig 2 A,B).

230 To further support our results we showed that the level of ERK1/2 phosphorylation  
 231 was lower compared with the non pretreated groups after prtreatment with MLA or  
 232 si-RNA of  $\alpha 7$ -nAChR by both, Western blot and immunofluorescent assay (Fig 4A,C  
 233 and Fig 5A,C). Our migration and wound healing assay showed that the migratory  
 234 ability of SGC cells in the pretreated group decreased more compared to non  
 235 pretreated cells (Fig 4B and Fig 5B). To clarify whether rL-RVG modulates the  
 236 MEK/ERK signaling pathway to suppress cell migration, corynoxenine, an inhibitor  
 237 of the MEK/ERK pathway, was used to pre-treat gastric cancer cells (Fig 6A-C).We  
 238 obtained comparable results in the groups treated with MLA and si-RNA of  
 239  $\alpha 7$ -nAChR as described above .However, opposite results were obtained when cells

240 were pre-treated with ACB (Fig 3A-C). These results indicate that rL-RVG attenuates  
241 the activation levels of MEK/ERK pathway via blocking  $\alpha 7$ -nAChR by competition.

## 242 **rL-RVG reduced EMT by regulating $\alpha 7$ -nAChR**

243 In our study Western blot analysis revealed that the protein expression level of  
244 E-cadherin was increased while N-cadherin, and Vimentin were decreased in the  
245 rL-RVG or NDV groups compared with the PBS treated control group (Fig 1A).  
246 Furthermore, the groups pre-treated with MLA showed that the expression of  
247 E-cadherin was lower and the expression of N-cadherin and Vimentin was higher  
248 compared with the non-pretreated groups using western blot analysis (Fig 4A, D).  
249 We found similar results after the pretreatment with the si-RNA of  $\alpha 7$ -nAChR (Fig 5A,  
250 D), as well as in the corynoxenine treated group (Fig 6A,D). In addition the opposite  
251 result also obtained in ACB pretreating groups compared with the groups pretreated  
252 with MLA or si-RNA.

## 253 **rL-RVG inhibits subcutaneous growth of gastric cancer cells**

254 A Tumor-bearing mouse model was established to confirm the antitumor effect of  
255 rL-RVG *in vivo*. Our results show that the tumor size of nude mice infected with  
256 rL-RVG and NDV was smaller than in the PBS group, and within the treated groups  
257 the tumor size in the rL-RVG group was smaller than in the NDV group (Fig.7).

## 258 **Discussion**

259 Although the incidence of gastric cancer has declined rapidly<sup>[17]</sup>, it is still a major  
260 challenge to obtain early diagnosis and provide effective treatment options<sup>[18]</sup>. Tumor

261 metastasis is the main cause of death in patients with gastric cancer. Therefore it is  
 262 important to understand how to reduce metastasis formation and to find key methods  
 263 of curing advanced-stage gastric cancer. In our study, recombinant avirulent NDV  
 264 LaSota strain expressing the rabies virus glycoprotein rL-RVG did not only suppress  
 265 migration of gastric cancer cells such as BGC and SGC cells *in vitro*, but also  
 266 inhibited growth of subcutaneous tumor in nude mice *in vivo*. Our results demonstrate  
 267 that rL-RVG suppresses gastric cancer cell migration by inhibiting the  
 268  $\alpha 7$ -nAChR/MEK-ERK-EMT axis.

269 With the development of modern cancer treatment, oncolytic therapy is becoming a  
 270 novel biological treatment option that integrates gene therapy with immunotherapy.  
 271 Recent studies revealed that the oncolytic Newcastle disease virus (NDV) replicates  
 272 selectively and destroys tumor cells without damaging healthy cells<sup>[19,20]</sup>. Thus,  
 273 selective killing has a higher efficiency accompanied by lower side effects. The  
 274 198-214 amino acid sequence of Rabies virus glycoprotein (RVG) is highly  
 275 homologous with the 30–56 amino acid sequence in  $\lambda$ -bungarotoxin, which binds  
 276 nAChRs. Therefore RVG has similar inhibiting effects as  $\lambda$ -bungarotoxin and has not  
 277 only oncolytic effects but also blocks nAChRs by competitive antagonism which is a  
 278 common mechanism of many pharmacological drugs. Thus, rL-RVG plays an role as  
 279 competitive antagonist of  $\alpha 7$ -nAChR after infecting gastric cancer cell lines such as  
 280 BGC and SGC.

281 nAChR consists of five subunits and assembles into heteromeric or homomeric  
 282 pentamers.  $\alpha 7$ -nAChR, another type of nAChR, has a positive effect on cancer cell

283 migration<sup>[21]</sup>. Nicotine and NNK could act as agonists of  $\alpha 7$ -nAChR to facilitate the  
 284 migration of gastric cancer cells<sup>[12,22]</sup> and could indirectly activate ERK signaling  
 285 through promoting the release of epidermal growth factor (EGF) and trans-activation  
 286 of EGF receptors<sup>[23]</sup>. Moreover, the ERK signaling pathway also has influence on  
 287 EMT that may regulate expression of mesenchymal and epithelial repressor  
 288 genes<sup>[24]</sup>. In our study, we suggest that rL-RVG could lower the phosphorylation levels  
 289 of ERK signaling and decrease EMT in SGC and BGC cells, indicating that gastric  
 290 cancer cell migration which is suppressed by rL-RVG, is associated with the  
 291 MEK-ERK signaling pathway.

292 It is of great significance to activate EMT for invasion and metastasis of gastric  
 293 cancer cells<sup>[25]</sup>. An aberrant EMT activation typically results in the transformation of  
 294 epithelial cells into mesenchymal cells and leads to phenotypic changes such as the  
 295 loss of cell-cell adhesion, cell polarity and acquisition of migratory and invasive  
 296 properties of cells. Cadherin is a significant component of adherent cell junctions. On  
 297 one hand, aberrant activation of EMT could transform E-cadherin to N-cadherin,  
 298 which is typically found in mesenchymal cells and could promote the formation of  
 299 adhesions between cells and the stroma<sup>[26]</sup>. On the other hand, Vimentin is a  
 300 widespread mesenchymal intermediate filament which results in adhesion and  
 301 migration in activated cells<sup>[27]</sup> and is a hallmark of aberrant EMT activation in  
 302 gastric cancer<sup>[28]</sup>. Our previous studies suggest that rL-RVG promotes apoptosis of  
 303 gastric cancer cells<sup>[14,29]</sup> but the effect of rL-RVG on gastric cancer migration and its  
 304 underlying mechanism remain unknown. In this study, our results show for the first

time that gastric cancer cell migration is suppressed after infection of gastric cancer cells with rL-RVG through competitive inhibition of  $\alpha 7$ -nAChR. This resulted in the decreased expression of mesenchymal markers including N-cadherin and vimentin and increased levels of the epithelial marker E-cadherin. Nicotine promotes migration of gastric cancer cells via the  $\alpha 7$ -nAChR pathway<sup>[12]</sup>. Thus we hypothesized that rL-RVG might suppress the migration of cancer cells via  $\alpha 7$ -nAChR. To demonstrate this we used ACB, MLA and si-RNA of  $\alpha 7$ -nAChR to pre-treat SGC cells and our results further confirmed our hypothesis.

Previous studies suggest that the ERK signaling pathway plays an important role in the proliferation, migration and apoptosis of cells<sup>[30-31]</sup>. Therefore, inhibiting the ERK signaling pathway strengthens the anti-tumor activity of gimatecan in gastric cancer<sup>[32]</sup>. Activation of ERK signaling results in the promotion of cervical cancer cell growth and metastasis<sup>[33]</sup>. Interestingly, we found that rL-RVG reduces the phosphorylation levels of MEK/ERK and resulted in a decrease of phosphorylation levels in MLA,  $\alpha 7$ -nAChR and si-RNA pre-treated groups compared to the ACB pre-treated group. Additionally, we also achieved similar results in the change of EMT and migration of SGC cells. Hawsawi O and Henderson V suggested that HMGA2 may induce EMT via ERK signaling pathways<sup>[34]</sup>. In our study, after pretreating with corynoxenine, we found that the expression of N-cadherin and Vimentin was down-regulated and the expression of E-cadherin was upregulated compared to non-pretreated groups. We also found that rL-RVG has a much more inhibitory effect than NDV. Thus, rL-RVG does not only have the same effect as NDV, but also plays a

327 role as competitive antagonist to inhibit  $\alpha 7$ -nAChR.

328 In conclusion, our research provides a new option in treating gastric cancer and  
 329 provides insights into the mechanisms of rL-RVG on gastric cancer. For the first time  
 330 we demonstrated that rL-RVG acts as competitive antagonist of  $\alpha 7$ -nAChR to  
 331 suppress the migration of gastric cancer cells through inhibition of  
 332  $\alpha 7$ -nAChR-MEK/ERK-EMT.

333

334

335

336

337

338

339

340

341

342

343

344

345

346

347

348 **Legend**

349



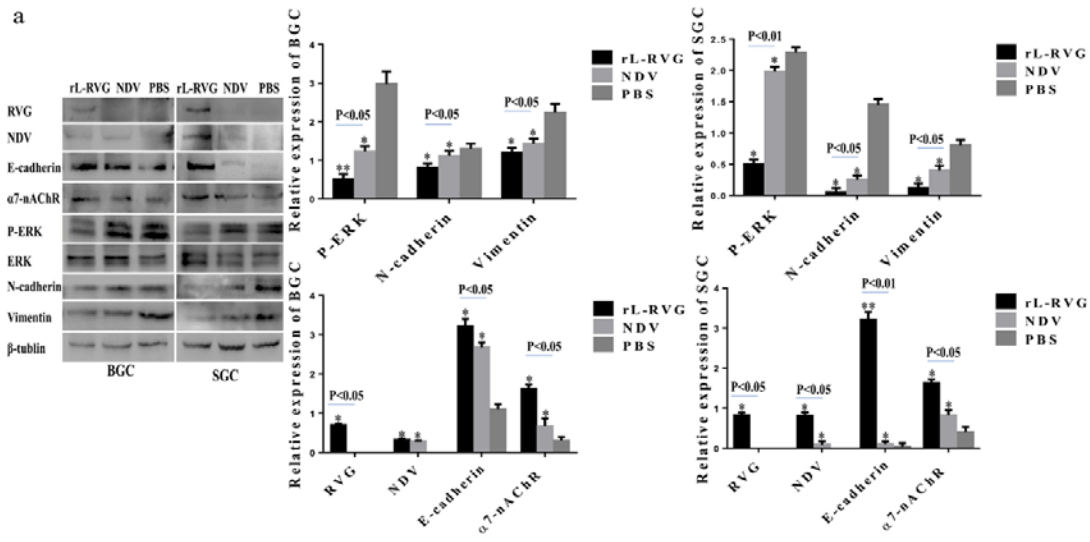

350

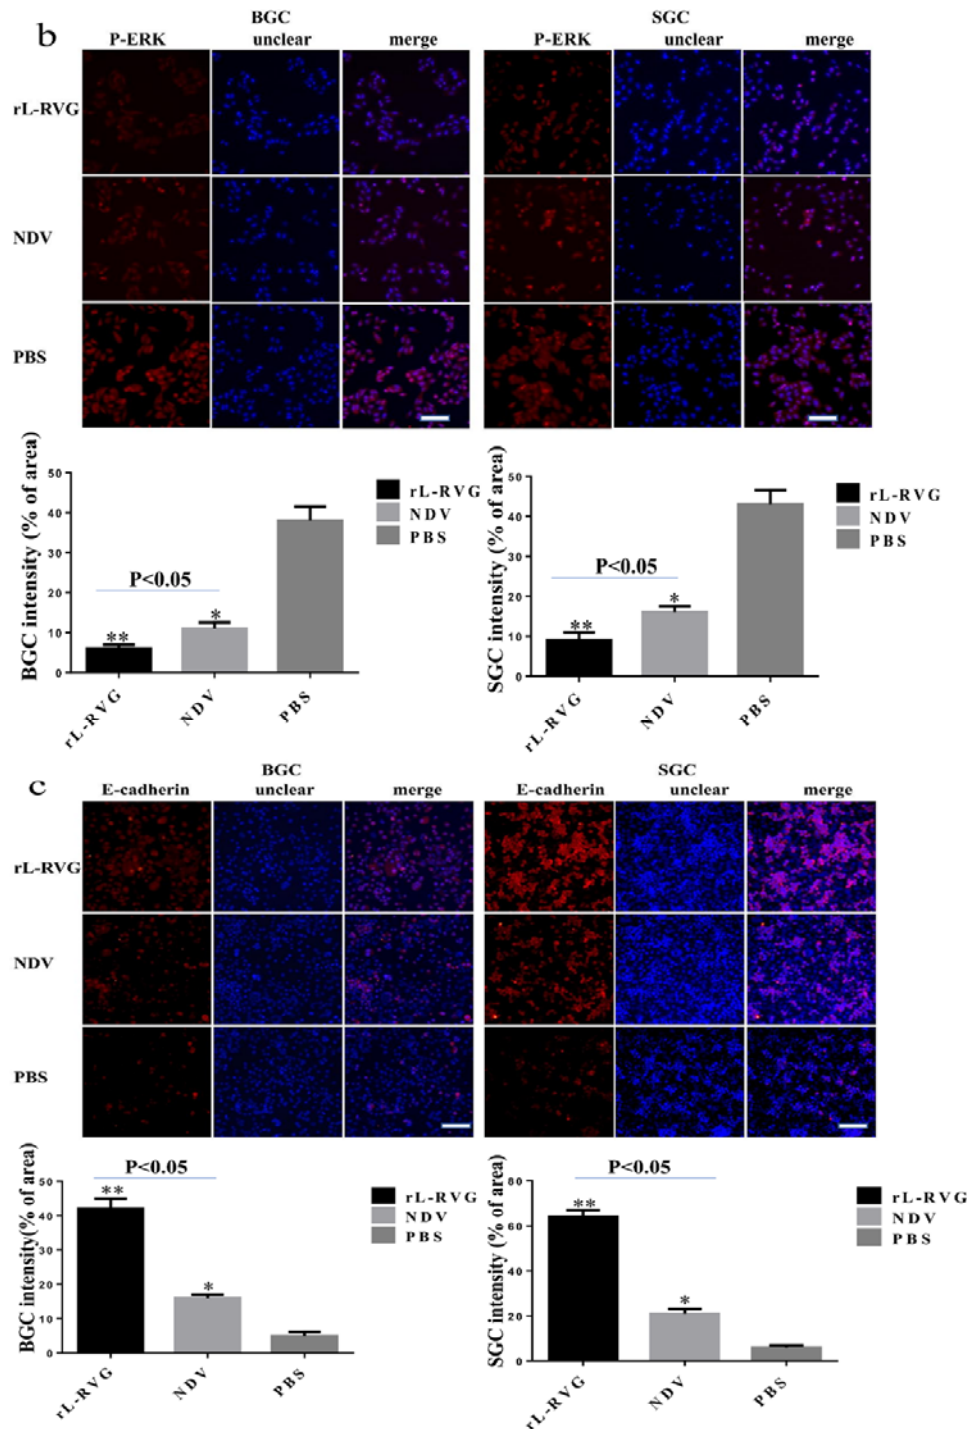

Figure 1 Expression of RVG, NDV,  $\alpha 7$ -nAChR, MEK/ERK signaling pathway and epithelial/mesenchymal markers proteins in infected BGC and SGC cells. **a.** Western blot analysis of RVG, NDV,  $\alpha 7$ -nAChR, MEK/ERK signaling pathway and epithelial/mesenchymal proteins. **b.** Immunofluorescence analysis of P-ERK. **c.** Immunofluorescence analysis of EMT protein markers E-cadherin. BGC and SGC cells were infected with either rL-RVG, NDV and PBS for 24 h.

358 \* $P < 0.5$ , \*\* $P < 0.01$ . (rL-RVG vs NDV and PBS groups, respectively, Bar=25  $\mu$ m).

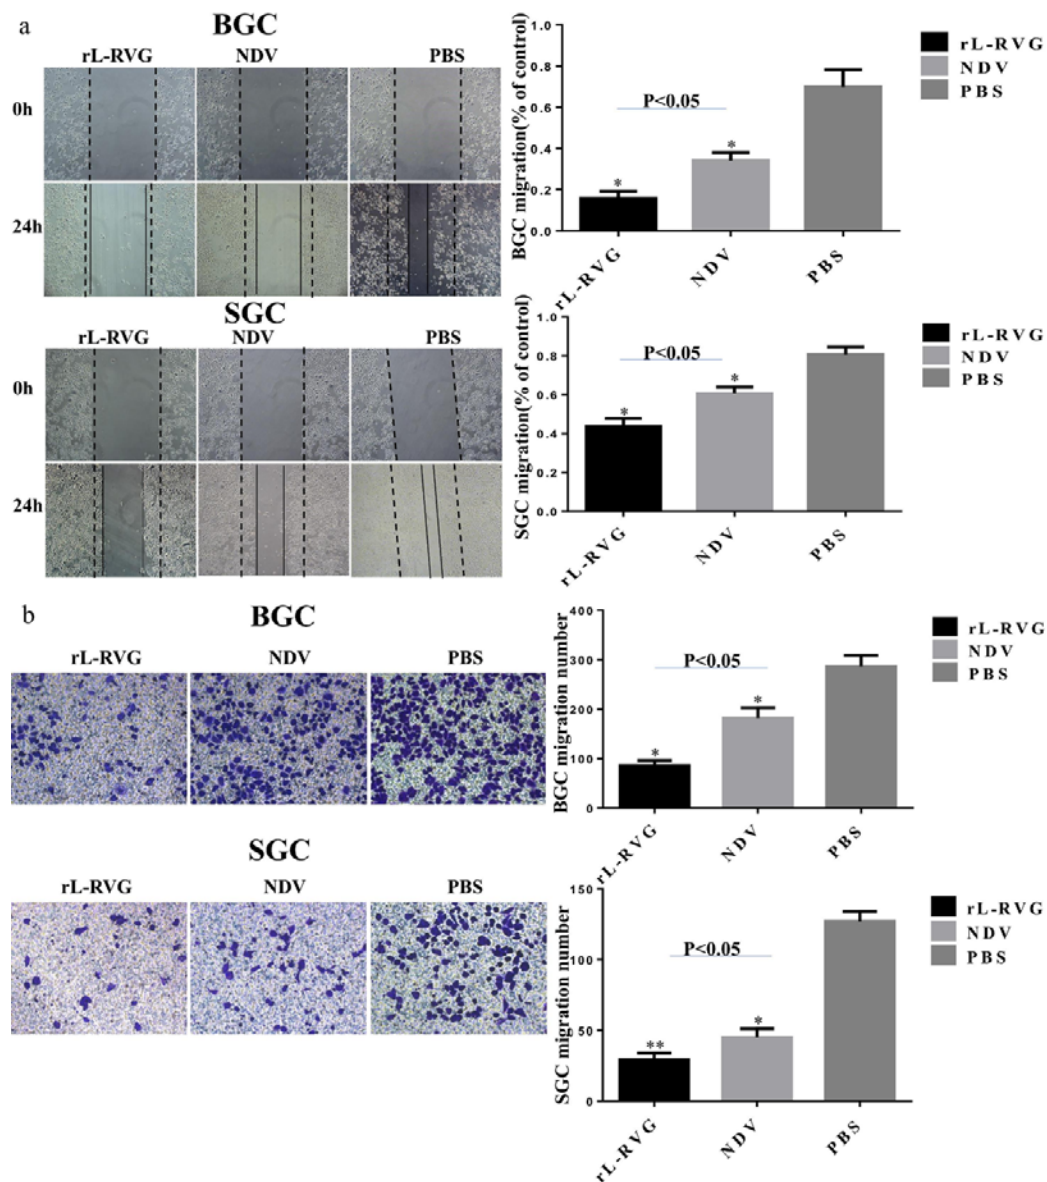

359

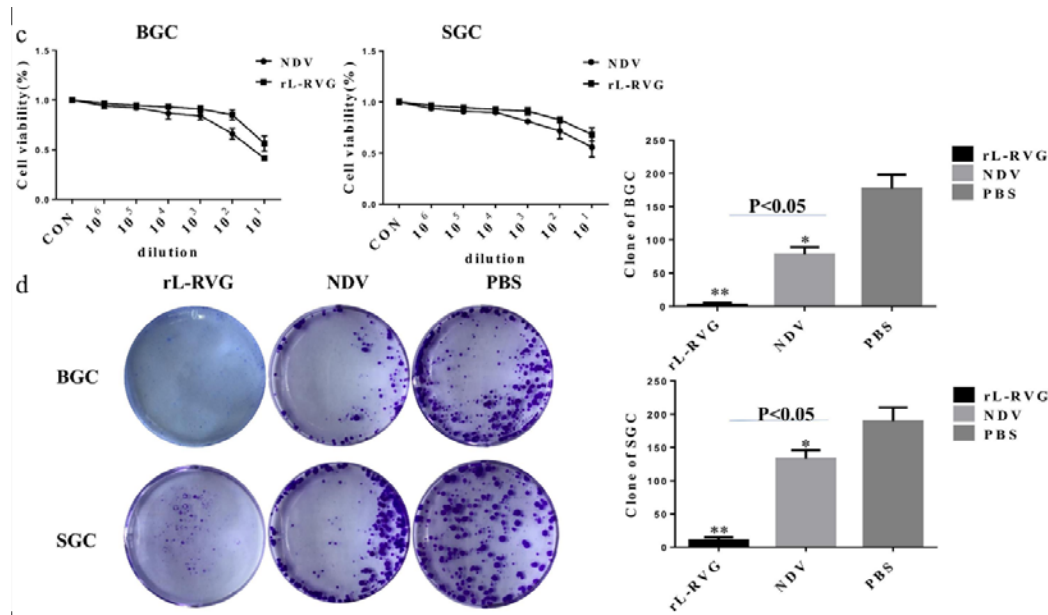

360

361 Figure 2 rL-RVG suppresses the proliferation and migration of BGC and SGC cells. **a.**  
 362 Healing and **b.**transwell assays were used to monitor the migration of BGC and SGC  
 363 cells infected with rL-RVG, NDV and PBS, respectively. **c.**Influence of different  
 364 rL-RVG, NDV dilution titers on the viability of BGC and SGC cells. **d.** The  
 365 clonogenic activity of BGC and SGC cells after infection with rLRVG and NDV at a  
 366 multiplicity of infection of 10. Colony formation was attenuated in the rL-RVG group.  
 367 \* $P<0.5$ , \*\* $P<0.01$ .(rL-RVG vs NDV and PBS groups, respectively).

368

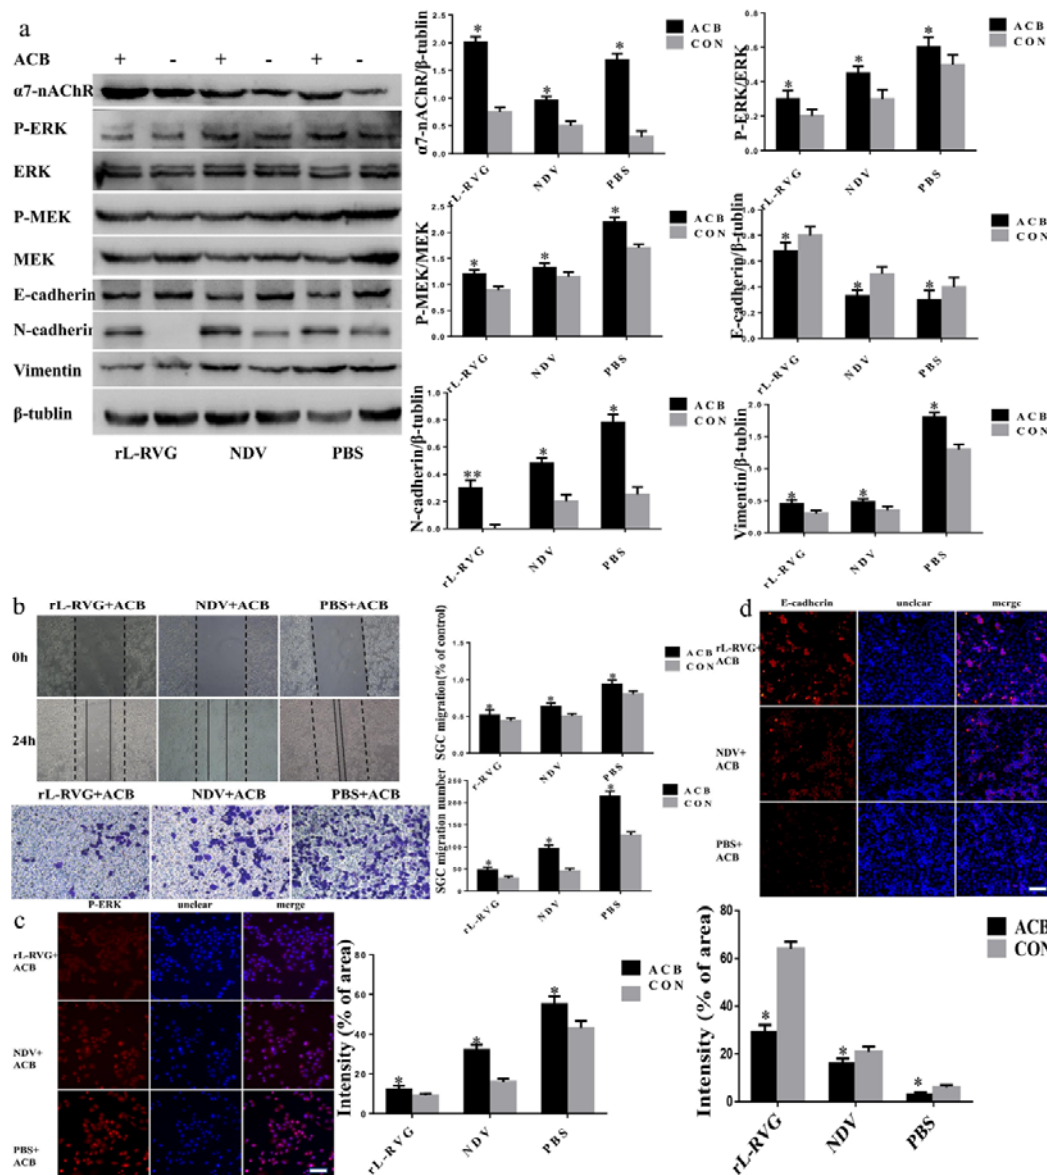

369

370 Figure 3. Effects of rL-RVG and ACB pretreated SGC cells on the  $\alpha 7$ -nAChR,  
 371 MEK/ERK signaling pathway, epithelial/mesenchymal proteins and cell migration. **a.**  
 372 Western blot analysis of  $\alpha 7$ -nAChR, MEK/ERK signaling pathway and  
 373 epithelial/mesenchymal protein marker. **b.** Cell migration was detected by wound  
 374 healing and transwell assay. **c.** Immunofluorescence analysis of P-ERK. **d.**  
 375 Immunofluorescence analysis of EMT proteins E-cadherin in infected SGC cells.  
 376 \* $P < 0.5$ , \*\* $P < 0.01$ . (rL-RVG+ACB vs rL-RVG, NDV+ACB vs NDV, PBS+ACB vs  
 377 PBS, respectively, Bar=25  $\mu$ m).



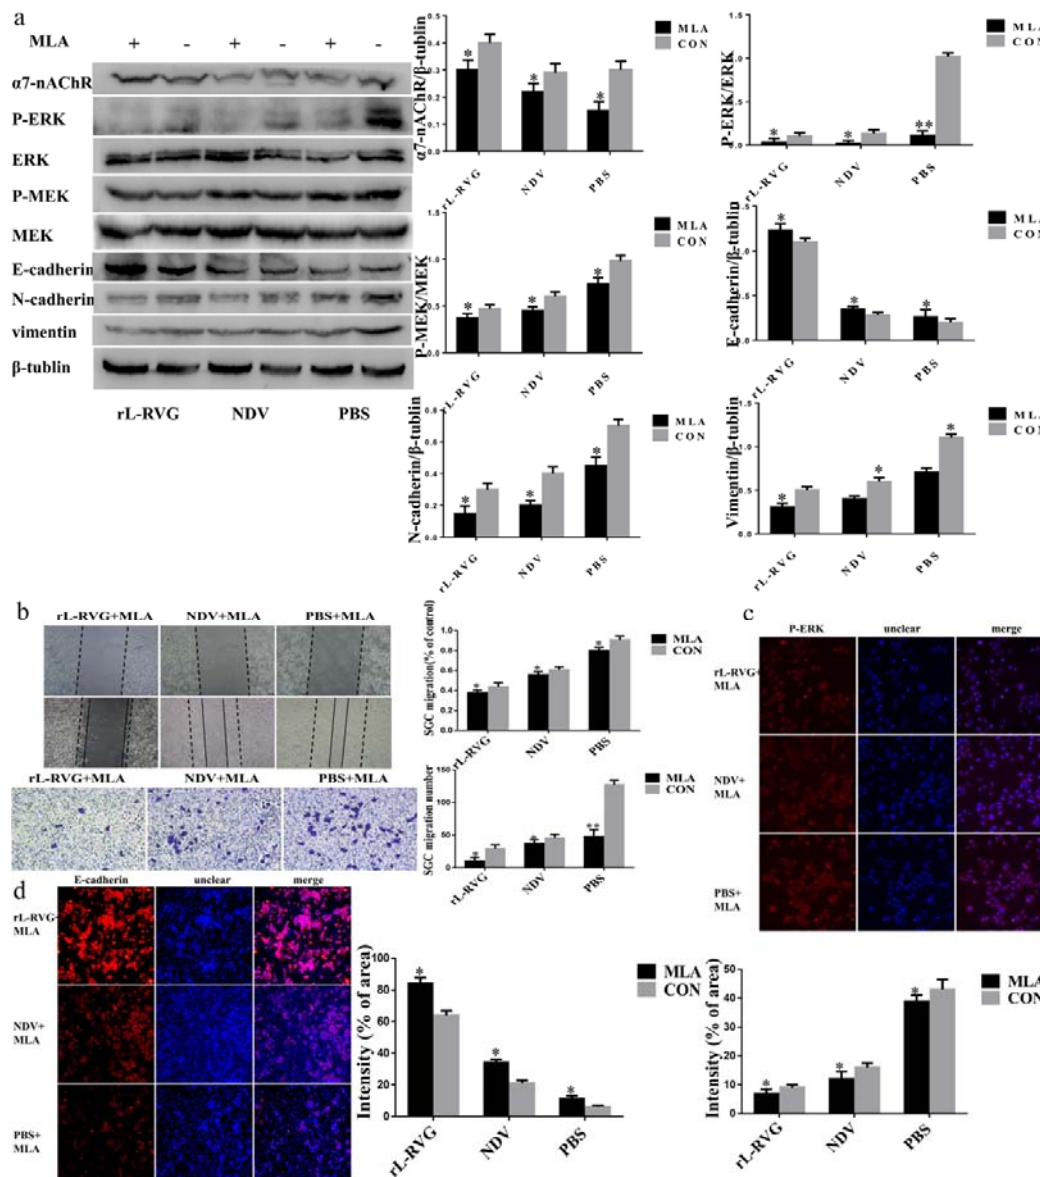

378

379 Figure 4. Effects of rL-RVG and MLA pretreated cells on  $\alpha 7$ -nAChR, MEK/ERK  
380 signaling pathway and epithelial/mesenchymal proteins and migration of cells. **a.**  
381 Western blot analysis of the  $\alpha 7$ -nAChR, MEK/ERK signaling pathway and  
382 epithelial/mesenchymal protein markers. **b.** Cell migration was detected by wound  
383 healing and transwell assay. **c.** Immunofluorescence analysis of P-ERK. **d.**  
384 Immunofluorescence analysis of EMT markers E-cadherin in infected SGC cells.  
385 \* $P < 0.5$ , \*\* $P < 0.01$  (rL-RVG+MLA vs rL-RVG, NDV+MLA vs NDV, PBS+MLA vs  
386 PBS, Bar=25  $\mu$ m).

387

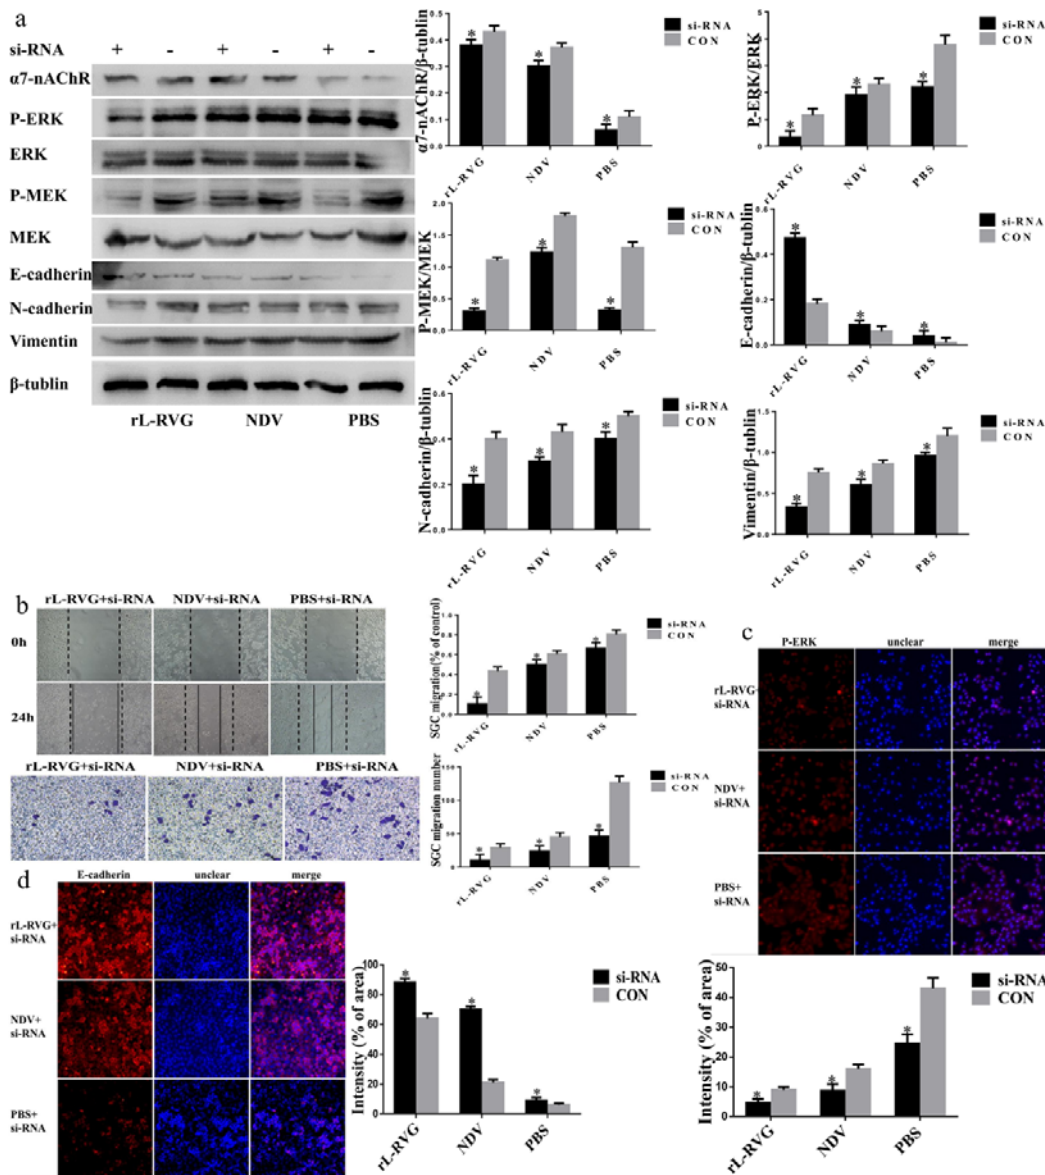

388

389 Figure 5 Effects of rL-RVG and si-RNA pretreated SGC cells on the  $\alpha 7$ -nAChR,  
390 MEK/ERK signaling pathway and epithelial/mesenchymal proteins and cell migration.  
391 **a.** Western blot analysis of  $\alpha 7$ -nAChR, MEK/ERK signaling pathway and  
392 epithelial/mesenchymal proteins. **b.** Cell migration was detected by wound healing  
393 and transwell assay. **c.** Immunofluorescence analysis of P-ERK. **d.**  
394 Immunofluorescence analysis of EMT proteins E-cadherin in infected SGC  
395 cells. \* $P<0.05$ , \*\* $P<0.01$  (rL-RVG+si-RNA vs rL-RVG, NDV+si-RNA vs NDV,  
396 PBS+si-RNA vs PBS, Bar=25  $\mu$ m).

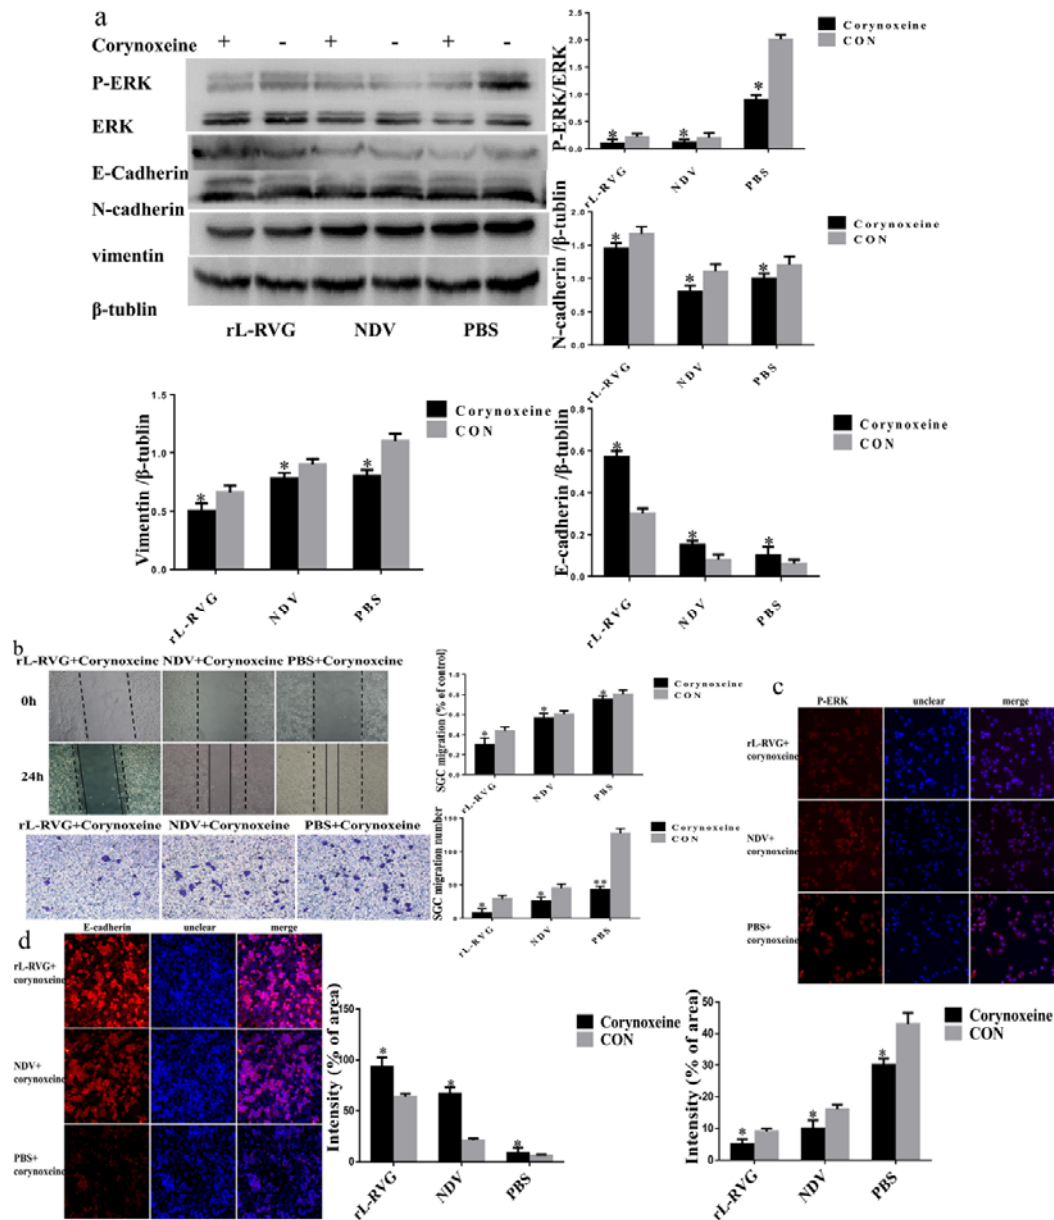

Figure 6. Effects of rL-RVG and corynoxene pretreated SGC cells on  $\alpha 7$ -nAChR, ERK and epithelial/mesenchymal proteins and cell migration. **a.** Western blot analysis of  $\alpha 7$ -nAChR, P-ERK/ERK and epithelial/mesenchymal markers. **b.** Cell migration of SGC cells was detected by wound healing and transwell assay. **c.** Immunofluorescence analysis of P-ERK in SGC cells. **d.** Immunofluorescence analysis of EMT protein E-cadherin in infected SGC cells. \* $P < 0.05$ , \*\* $P < 0.01$  (rL-RVG+corynoxene vs rL-RVG, NDV+corynoxene vs NDV, PBS+corynoxene vs PBS, Bar=25  $\mu$ m).



407

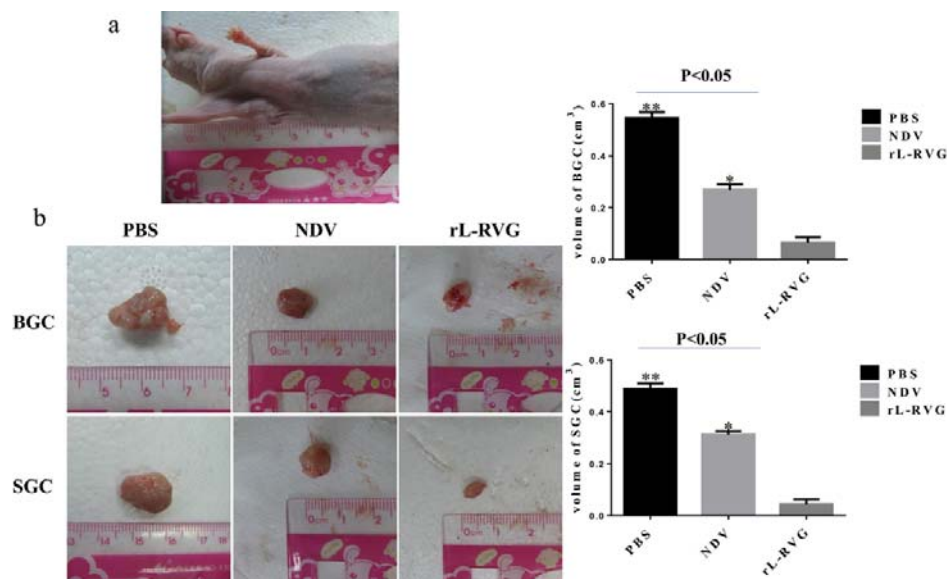

408

409 Figure 7 rL-RVG suppressed the growth of subcutaneous tumor of BGC and SGC  
 410 cells in vivo. **a.** The subcutaneous tumor model was successfully established. **b.** BGC  
 411 and SGC cells were pretreated with rL-RVG, NDV or PBS for 24 h and then  
 412 subcutaneously injected into axillary subcutaneous tissues of adult female  
 413 athymic-nude mice. The subcutaneous tumor was examined after two weeks post  
 414 treatment. \* $P<0.5$ , \*\* $P<0.01$ . (rL-RVG vs NDV and PBS groups, respectively).

415

## References

- [1] Bray F, Ferlay J, Soerjomataram I, Siegel RL, Torre LA, Jemal A. Global cancer statistics 2018: GLOBOCAN estimates of incidence and mortality worldwide for 36 cancers in 185 countries. *CA Cancer J Clin.* 2018;68(6):394-424.
- [2] Chen W, Zheng R, Baade P D, Zhang S, Zeng H, Bray F, Jemal A, Yu XQ, He J. Cancer statistics in China, 2015. *CA Cancer J Clin.* 2016;66(2): 115-132.
- [3] Jin X, Zhu Z, Shi Y. Metastasis mechanism and gene/protein expression in gastric cancer with distant organs metastasis. *Bull Cancer.* 2014; 101(1): E1-12.
- [4] Millar NS, Gotti C. Diversity of vertebrate nicotinic acetylcholine receptors. *Neuropharmacology* 2009;56(1):237-246.
- [5] Wessler I, Kirkpatrick C J. Acetylcholine beyond neurons: the non-neuronal cholinergic system in humans. *Br J Pharmacol.* 2008;154(8): 1558-1571.
- [6] Schuller HM. Neurotransmitter receptor-mediated signaling pathways as modulators of carcinogenesis. *Prog Exp Tumor Res.* 2007;39:45-63.

- [7] Pavlov V A, Ochani M, Yang L H, Gallowitsch-Puerta M, Ochani K, Lin X, Levi J, Parrish WR, Rosas-Ballina M, Czura CJ, Larosa GJ, Miller EJ, Tracey KJ, Al-Abed Y. Selective  $\alpha 7$ -nicotinic acetylcholine receptor agonist GTS-21 improves survival in murine endotoxemia and severe sepsis. *Crit Care Med.* 2007; 35(4): 1139-1144.
- [8] Grando S A. Connections of nicotine to cancer. *Nature Reviews Cancer*, 2014, 14(6): 419-429.
- [9] Xu J, Liu D, Niu H, Zhu G, Xu Y, Ye D, Li J, Zhang Q. Resveratrol reverses Doxorubicin resistance by inhibiting epithelial-mesenchymal transition (EMT) through modulating PTEN/Akt signaling pathway in gastric cancer. *J Exp Clin Cancer Res.* 2017;36(1): 19.
- [10] Yang Y, Zhang J, Yan Y, Cai H, Li M, Sun K, Wang J, Liu X, Wang J, Duan X. Low expression of Rap1GAP is associated with epithelial-mesenchymal transition (EMT) and poor prognosis in gastric cancer. *Oncotarget.* 2017;8(5):8057-8068.
- [11] Carino A, Graziosi L, D'Amore C, Cipriani S, Marchianò S, Marino E, Zampella A, Rende M1, Mosci P, Distrutti E, Donini A, Fiorucci S. The bile acid receptor GPBAR1 (TGR5) is expressed in human gastric cancers and promotes epithelial-mesenchymal transition in gastric cancer cell lines. *Oncotarget.* 2016;7(38):61021-61035.
- [12] Lien Y C, Wang W, Kuo L J, Liu J J, Wei P L, Ho Y S, Ting W C, Wu C H, Chang Y J. Nicotine promotes cell migration through  $\alpha 7$  nicotinic acetylcholine receptor in gastric cancer cells. *Ann Surg Oncol.* 2011;18(9):2671-2679.
- [13] Zhang C, Ding X P, Zhao Q N, Yang X J, An S M, Wang H, Xu L, Zhu L, Chen H Z. Role of  $\alpha 7$ -nicotinic acetylcholine receptor in nicotine-induced invasion and epithelial-to-mesenchymal transition in human non-small cell lung cancer cells. *Oncotarget.* 2016;7(37):59199-59208.
- [14] Bu X, Zhao Y, Zhang Z, Wang M, Li M, Yan Y. Recombinant Newcastle disease virus (rL-RVG) triggers autophagy and apoptosis in gastric carcinoma cells by inducing ER stress. *Am J Cancer Res.* 2016;6(5): 924-936.
- [15] Yan Y, Su C, Hang M, Huang H, Zhao Y, Shao X, Bu X. Recombinant Newcastle disease virus rL-RVG enhances the apoptosis and inhibits the migration of A549 lung adenocarcinoma cells via regulating  $\alpha 7$  nicotinic acetylcholine receptors in vitro. *Virol J.* 2017;14(1):190.
- [16] Yan Y, Liang B, Zhang J, Liu Y, Bu X. Apoptotic induction of lung adenocarcinoma A549 cells infected by recombinant RVG Newcastle disease virus (rL-RVG) in vitro. *Mol Med Rep.* 2015;11:317-326.
- [17] Balakrishnan M, George R, Sharma A, Graham D Y. Changing trends in stomach cancer throughout the world. *Curr Gastroenterol Rep.* 2017;19(8):36.
- [18] Matsuoka T, Yashiro M. Biomarkers of gastric cancer: Current topics and future perspective. *World J Gastroenterol.* 2018;24(26): 2818-2832.
- [19] LaRocca C J, Warner S G. Oncolytic viruses and checkpoint inhibitors: combination therapy in clinical trials. *Clin Transl Med.* 2018;7(1): 35.

- [20] Chulpanova D, Solovyeva V, Kitaeva K, Dunham SP, Khaiboullina SF, Rizvanov AA. Recombinant Viruses for Cancer Therapy. *Biomedicines*.2018;6(4). pii: E94
- [21] Kraiss A M, Hautefeuille A H, Cros M P, Krutovskikh V, Tournier JM, Birembaut P, Thépot A, Paliwal A, Herceg Z, Boffetta P, Brennan P, Hainaut PL. CHRNA5 as negative regulator of nicotine signaling in normal and cancer bronchial cells: effects on motility, migration and p63 expression. *Carcinogenesis*.2011;32(9): 1388-1395.
- [22] Wang W, Chin-Sheng H, Kuo L J, Wei PL, Lien YC, Lin FY, Liu HH, Ho YS, Wu CH, Chang YJ. NNK enhances cell migration through  $\alpha 7$ -nicotinic acetylcholine receptor accompanied by increased of fibronectin expression in gastric cancer. *Ann Surg Oncol*.2012;19 Suppl 3:S580-588.
- [23] Chernyavsky A I, Shchepotin I B, Grando S A. Mechanisms of growth-promoting and tumor-protecting effects of epithelial nicotinic acetylcholine receptors.*Int Immunopharmacol*. 2015, 29(1): 36-44.
- [24] Neuzillet C, Tijeras-Raballand A, de Mestier L, Cros J, Faivre S, Raymond E. MEK in cancer and cancer therapy.*Pharmacol Ther*.2014;141(2): 160-171.
- [25] Li T, Huang H, Shi G, Zhao L, Li T, Zhang Z, Liu R, Hu Y, Liu H, Yu J, Li G. TGF- $\beta 1$ -SOX9 axis-inducible COL10A1 promotes invasion and metastasis in gastric cancer via epithelial-to-mesenchymal transition. *Cell Death Dis*.2018;9(9): 849.
- [26] Peng Z, Wang C X, Fang E H, Wang GB, Tong Q. Role of epithelial-mesenchymal transition in gastric cancer initiation and progression.*World J Gastroenterol*. 2014;20(18): 5403-5410.
- [27] Zhao K, He J, Wang Y, Jin SD, Fan Y, Fang N, Qian J, Xu TP, Guo RH. EZH2-mediated epigenetic suppression of EphB3 inhibits gastric cancer proliferation and metastasis by affecting E-cadherin and vimentin expression. *Gene*.2018;686:118-124
- [28] Liang L, Zeng M, Pan H, Liu H, He Y. Nicotinamide N-methyltransferase promotes epithelial-mesenchymal transition in gastric cancer cells by activating transforming growth factor- $\beta 1$  expression. *Oncol lett*. 2018;15(4): 4592-4598.
- [29] Bu X F, Wang M B, Zhang Z J, Zhao YH, Li M, Yan YL. Autophagy is involved in recombinant Newcastle disease virus (rL-RVG)-induced cell death of stomach adenocarcinoma cells in vitro.*Int J Oncol*.2015; 47(2): 679-689.
- [30] Sun Y, Liu W Z, Liu T, Feng X, Yang N, Zhou HF. Signaling pathway of MAPK/ERK in cell proliferation, differentiation, migration, senescence and apoptosis. *J Recept Signal Transduct Res*.2015; 35(6): 600-604.
- [31] Huo Y N, Chen W, Zheng X X. ROS, MAPK/ERK and PKC play distinct roles in EGF-stimulated human corneal cell proliferation and migration.*Cell Mol Biol (Noisy-le-grand)*.2015; 61(7): 6-11.
- [32] Chen Z, Liu Z, Huang W, Li Z, Zou J, Wang J, Lin X, Li B, Chen D, Hu Y, Ji J, Gao J, Shen

L. Gimitecan exerts potent antitumor activity against gastric cancer in vitro and in vivo via AKT and MAPK signaling pathways. *J Transl Med.* 2017;15(1): 253.

[33] Yang P, Su C, Luo X, Zeng H, Zhao L, Wei L, Zhang X, Varghese Z, Moorhead JF, Chen Y, Ruan XZ. Dietary oleic acid-induced CD36 promotes cervical cancer cell growth and metastasis via up-regulation Src/ERK pathway. *Cancer Lett.* 2018;438:76-85

[34]Hawsawi O, Henderson V, Burton L J, Dougan J, Nagappan P, Odero-Marah V. High mobility group A2 (HMGA2) promotes EMT via MAPK pathway in prostate cancer. *Biochem Biophys Res Commun.*2018;504(1):196-202.
